# Supplementary material
Source: PubMed Central journal article supplement (PMC7458867)
Supplement: NIHMS1619645-supplement-Supplementary_materials.pdf [file NIHMS1619645-supplement-Supplementary_materials.pdf]

## Supplementary Materials for

### PD-1<sup>hi</sup> CD8<sup>+</sup> resident memory T cells balance immunity and fibrotic sequelae

Zheng Wang, Shaohua Wang, Nick P. Goplen, Chaofan Li, In Su Cheon, Qigang Dai, Su Huang, Jinjun Shan, Chaoyu Ma, Zhenqing Ye, Min Xiang, Andrew H. Limper, Eva-Carmona Porquera, Jacob E. Kohlmeier, Mark H. Kaplan, Nu Zhang, Aaron J. Johnson, Robert Vassallo, Jie Sun\*

\*Corresponding author. Email: sun.jie@mayo.edu

Published 14 June 2019, *Sci. Immunol.* 4, eaaw1217 (2019)

DOI: 10.1126/sciimmunol.aaw1217

#### The PDF file includes:

- Fig. S1. Epitope-specific expression of CD103 and PD-1 on T<sub>RM</sub> cells.
- Fig. S2. Epitope-specific expression of inhibitory receptors on T<sub>RM</sub> cells.
- Fig. S3. Exhausted-like T<sub>RM</sub> cells are present in the X31 influenza model.
- Fig. S4. Exhausted-like T<sub>RM</sub> cells respond effectively to recall in situ.
- Fig. S5. Cognate peptide inoculation directly promotes PD-1 expression on PA<sub>224–233</sub> T<sub>RM</sub> cells.
- Fig. S6. Nur77 (*Nr4a1*) is required for the induction and/or maintenance of exhausted-like T<sub>RM</sub> cells.
- Fig. S7. Limiting NP antigen dose decreases the exhaustion phenotype.
- Fig. S8. TCR signaling and inhibitor receptor expression on exhausted-like T<sub>RM</sub> cells are lost 4 months after infection.
- Fig. S9. Persistent MHC-I engagement maintains exhausted-like T<sub>RM</sub> phenotypes and cells.
- Fig. S10. NP<sub>366–374</sub> T<sub>RM</sub> cells, PD-1 expression, and heterologous protection are lost over time.
- Fig. S11. Continuous CD28 signaling is required for the maintenance of NP<sub>366–374</sub> T<sub>RM</sub> cells.
- Fig. S12. PD-L1 blockade promotes exhausted-like T<sub>RM</sub> cell survival and CD103 expression.
- Fig. S13. PD-L1 blockade promotes cytokine production of exhausted-like T<sub>RM</sub> cells to antigenic restimulation.
- Fig. S14. PD-L1 blockade promotes CD103 expression.
- Fig. S15. B7 signaling is required for the effects of PD-L1 blockade.
- Fig. S16. PD-L1 blockade promotes heterologous immunity and causes tissue pathology.
- Fig. S17. CD8 T cells are responsible for the development of tissue pathology after  $\alpha$ -PD-L1 blockade.
- Fig. S18. ILD lungs exhibit elevated PD-1, CD103, and TIM-3 expression.

#### Other Supplementary Material for this manuscript includes the following:

(available at [immunology.sciencemag.org/cgi/content/full/4/36/eaaw1217/DC1](https://immunology.sciencemag.org/cgi/content/full/4/36/eaaw1217/DC1))

Table S1 (Microsoft Excel format). Raw data.

Fig. S1

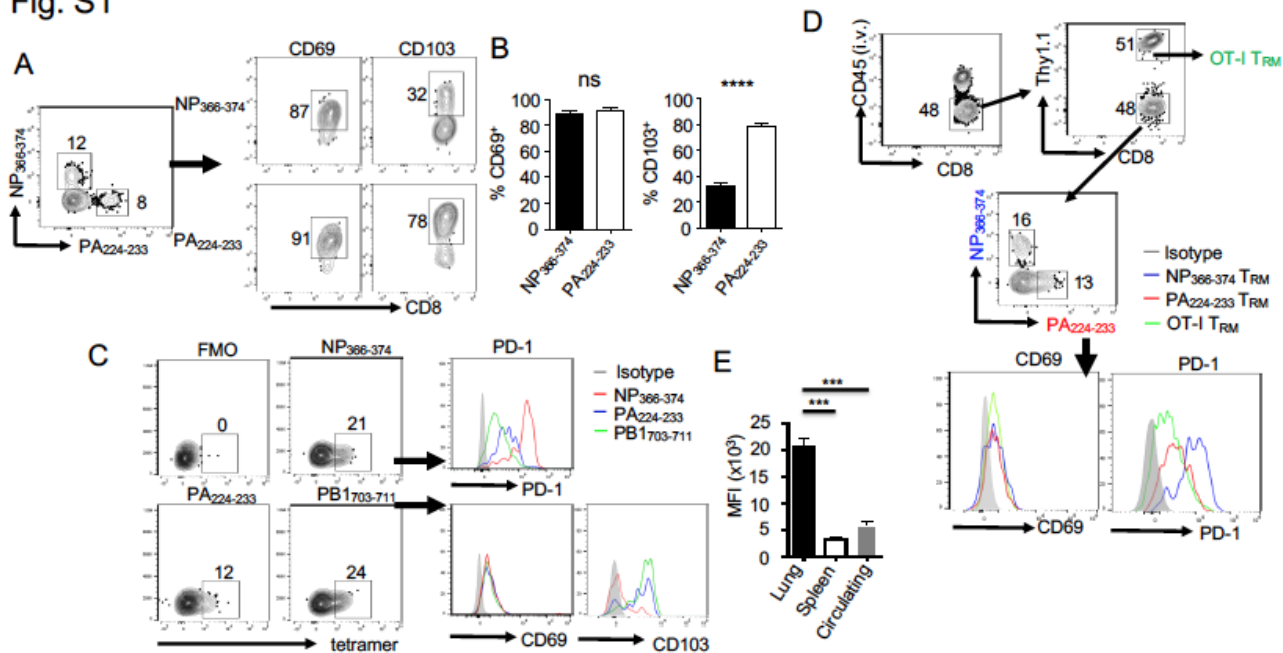

**Fig. S1 Epitope-specific expression of CD103 and PD-1 on T<sub>RM</sub>.** WT mice were infected with PR8. (A). Expression of CD69 and CD103 on lung NP<sub>366-374</sub> or PA<sub>224-233</sub> T<sub>RM</sub> cells at 40 d.p.i. (B). Percentages of CD69<sup>+</sup> or CD103<sup>+</sup> cells on lung NP<sub>366-374</sub> or PA<sub>224-233</sub> T<sub>RM</sub>. (C). CD69, CD103 or PD-1 expression on lung NP<sub>366-374</sub>, PA<sub>224-233</sub> or PB1703-711 tetramer<sup>+</sup> cells at 40 d.p.i. (D) WT mice were transferred with OVA-specific Thy1.1<sup>+</sup> OT-I T cells and then infected with recombinant PR8-OVA. T<sub>RM</sub> cells were examined at 45 d.p.i. PD-1 and CD69 expression by OT-I T<sub>RM</sub>, endogenous NP<sub>366-374</sub> or PA<sub>224-233</sub> T<sub>RM</sub> cells is depicted. (E). MFI of PD-1 expression on NP<sub>366-374</sub> lung T<sub>RM</sub>, spleen memory and lung circulating (labeled with i.v. Ab) memory T cells. Data are mean ± SD. n.s., not significant. \**P* < 0.05, \*\**P* < 0.01, \*\*\**P* < 0.001, unpaired two-tailed *t* test or One-way ANOVA with Tukey multiple comparison test.

Fig. S2

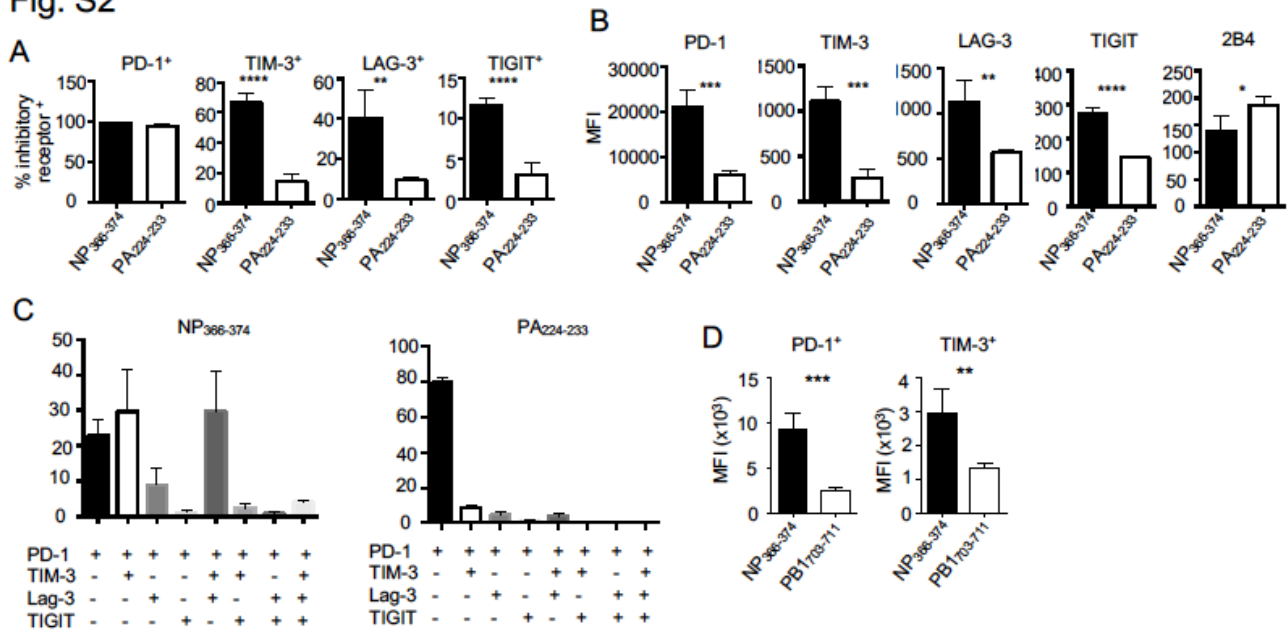

**Fig. S2 Epitope-specific expression of inhibitory receptors on T<sub>RM</sub>.** WT mice were infected with PR8 and T<sub>RM</sub> cells were examined at 40 d.p.i. (A). Quantification of % inhibitory receptor expression on NP<sub>366-374</sub> or PA<sub>224-233</sub> T<sub>RM</sub> cells. (B). MFI of individual inhibitory receptor expression on NP<sub>366-374</sub> or PA<sub>224-233</sub> T<sub>RM</sub> cells. (C). Simultaneous expression of multiple inhibitory receptors (PD-1, LAG-3, Tim-3 and TIGIT) on NP<sub>366-374</sub> or PA<sub>224-233</sub> T<sub>RM</sub> cells. (D). MFI of PD-1 or TIM-3 expression on NP<sub>366-374</sub> or PB1<sub>703-711</sub> T<sub>RM</sub> cells. Data are mean ± SD, n.s., not significant. \**P* < 0.05, \*\**P* < 0.01, \*\*\**P* < 0.001, unpaired two-tailed *t* test.

Fig. S3

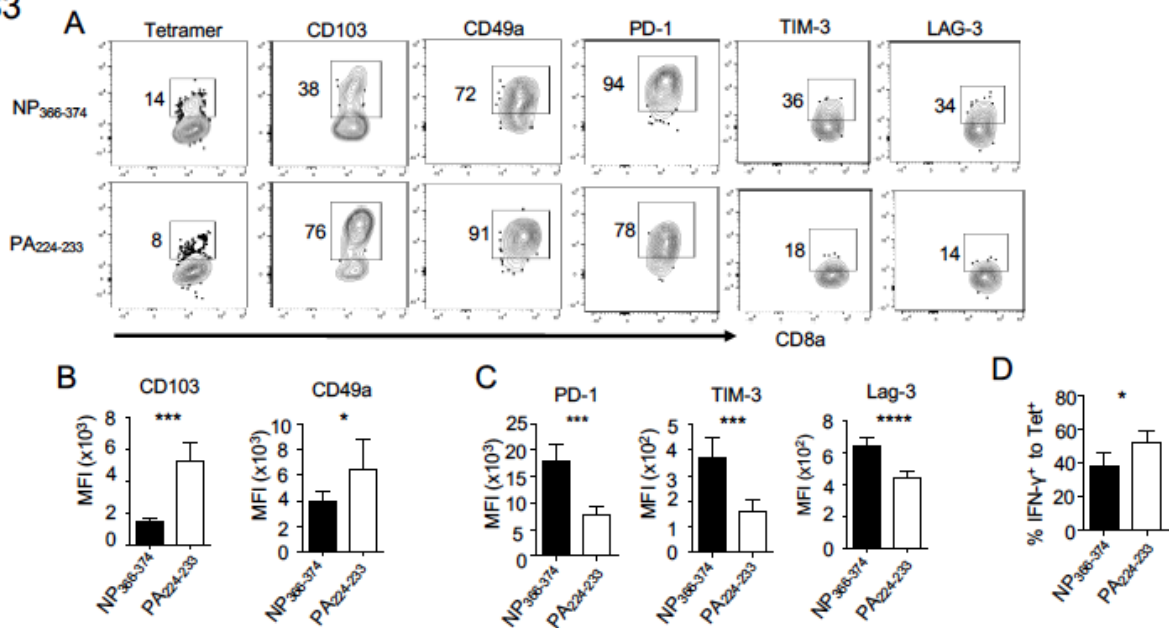

**Fig. S3 Exhausted-like T<sub>RM</sub> cells are present in X31 influenza model.** (A-C). WT mice were infected with influenza X31 strain and T<sub>RM</sub> cells were examined at 40 d.p.i. (A). Representative plots of tetramer staining and CD103, CD49a, PD-1, TIM-3 or LAG-3 staining on NP<sub>366-374</sub> or PA<sub>224-233</sub> T<sub>RM</sub> cells. (B). MFI of CD103 or CD49a expression on lung NP<sub>366-374</sub> or PA<sub>224-233</sub> T<sub>RM</sub> cells. (C). MFI of inhibitory receptors expression on lung NP<sub>366-374</sub> or PA<sub>224-233</sub> T<sub>RM</sub> cells. (D). WT mice were infected with PR8. T<sub>RM</sub> cells were examined following NP<sub>366-374</sub> or PA<sub>224-233</sub> peptide stimulation at 40 d.p.i. % IFN- $\gamma$ <sup>+</sup> cells relative to NP<sub>366-374</sub> or PA<sub>224-233</sub>-specific T<sub>RM</sub> cells (tetramer<sup>+</sup> cells). Representative of two experiments. Data are mean  $\pm$  SD, n.s., not significant. \* $P$  < 0.05, \*\* $P$  < 0.01, \*\*\* $P$  < 0.001, unpaired two-tailed  $t$  test.

**Fig. S4**

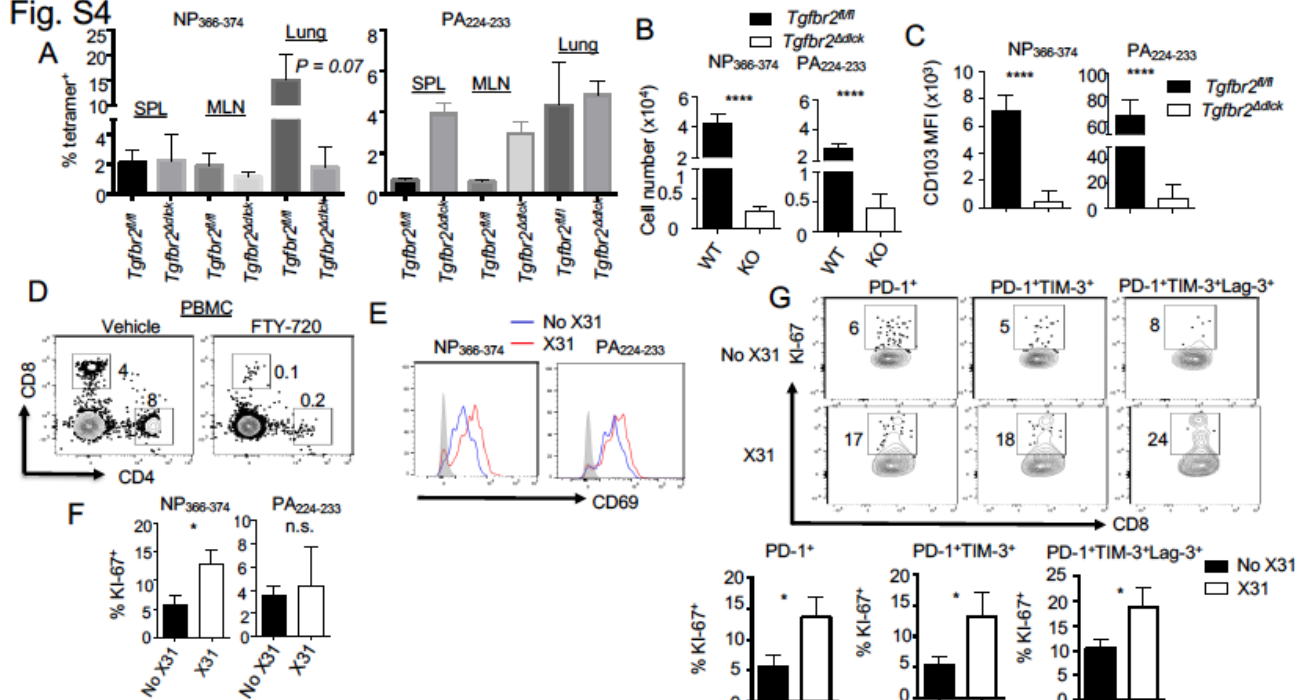

**Fig. S4 Exhausted-like  $T_{RM}$  cells respond effectively to recall *in situ*.** (A-C). Control (*Tgfb2<sup>fl/fl</sup>*) or *Tgfb2<sup>d/dlck</sup>* mice were infected with PR8. (A). % of NP<sub>366-374</sub> or PA<sub>224-233</sub>-specific T cells in the spleen (SPL), draining mediastinal lymph nodes (MLN) or the lungs at 9 d.p.i. (B). NP<sub>366-374</sub> or PA<sub>224-233</sub>  $T_{RM}$  cells were enumerated at 42 d.p.i. (C) CD103 MFI on NP<sub>366-374</sub> or PA<sub>224-233</sub>  $T_{RM}$  cells at 42 d.p.i. (D-G). WT mice were infected with PR8 and re-challenged with X31 at day 40 in the presence of FTY-720 to block T cell migration from lymphoid organs. Mice were sacrificed two days later for analysis. (D). % CD8 or CD4 T cells in PBMCs 24 hours following Vehicle or FTY-720 treatment. (E). CD69 expression on lung NP<sub>366-374</sub> or PA<sub>224-233</sub> cells. (F). % KI-67<sup>+</sup> cells in lung NP<sub>366-374</sub> or PA<sub>224-233</sub> cells. (G). Representative plots (up) and quantification (down) of percentages of KI-67<sup>+</sup> cells in indicated inhibitory receptor(s)<sup>+</sup> lung NP<sub>366-374</sub> cells. Representative of two to three experiments except in A. Data are mean  $\pm$  SD, n.s., not significant. \* $P < 0.05$ , \*\* $P < 0.01$ , \*\*\* $P < 0.001$ , unpaired two-tailed t test.

Fig. S5

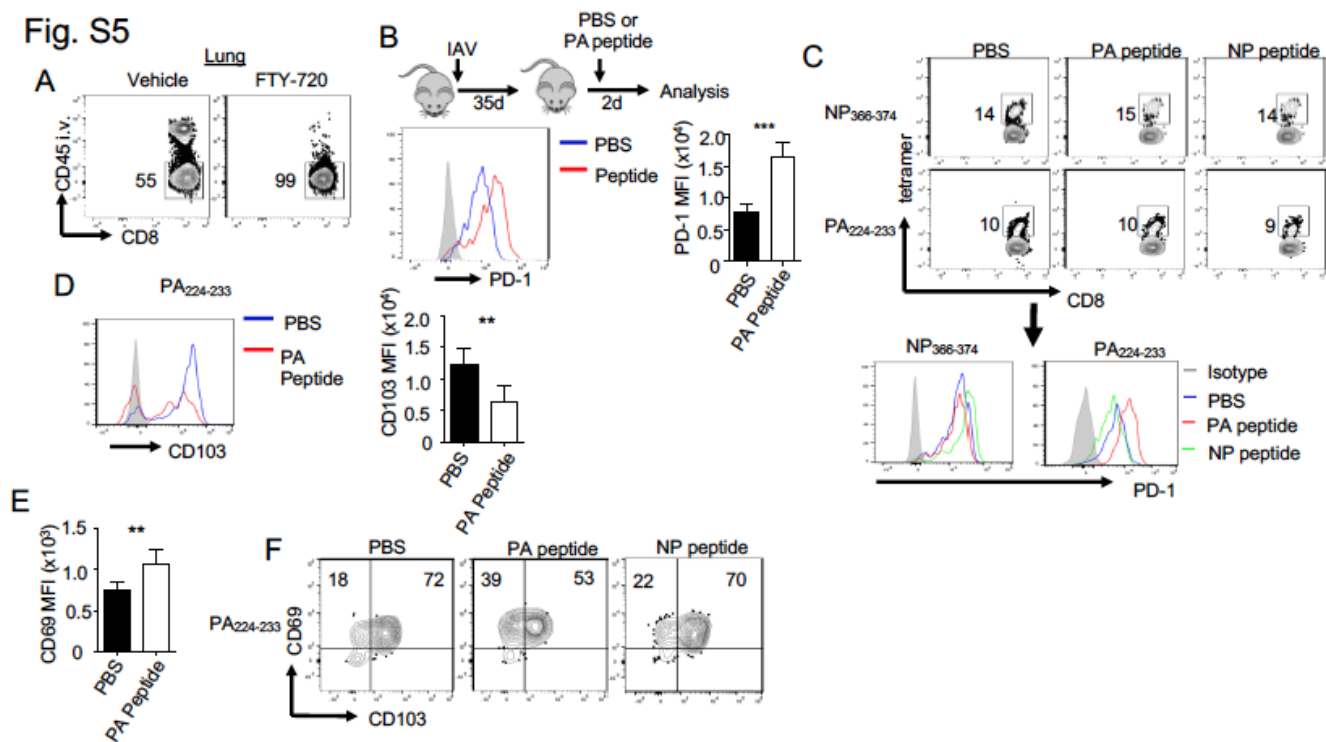

**Fig. S5 Cognate peptide inoculation directly promotes PD-1 expression on PA<sub>224-233</sub> T<sub>RM</sub> cells.** (A). WT mice were infected with PR8 and received vehicle or FTY-720 daily starting at 21 d.p.i. Mice were sacrificed at 40 d.p.i. % of i.v. CD45 Ab<sup>+</sup> cells in lung CD8<sup>+</sup> T cells is depicting. (B-F). WT mice were infected with PR8. (B). Schematic of experimental design, representative histogram (left) and quantification (right) of PD-1 expression on PA<sub>224-233</sub> T<sub>RM</sub> cells following PBS or PA<sub>224-233</sub> (PA) peptide inoculation. (C). PD-1 expression on PA<sub>224-233</sub> or NP<sub>366-374</sub> T<sub>RM</sub> following PBS, PA or NP peptide inoculation. (D). Representative histogram (left) and quantification (right) of CD103 expression on PA<sub>224-233</sub> T<sub>RM</sub> cells. (E). CD69 expression on PA<sub>224-233</sub> T<sub>RM</sub> cells. (F). Representative plots of CD69/CD103 expression on PA<sub>224-233</sub> T<sub>RM</sub> cells with or without peptide inoculation. Representative of two or three experiments. Data are mean ± SD, \*P < 0.05, \*\*P < 0.01, \*\*\*P < 0.001, unpaired two-tailed t test.

Fig. S6

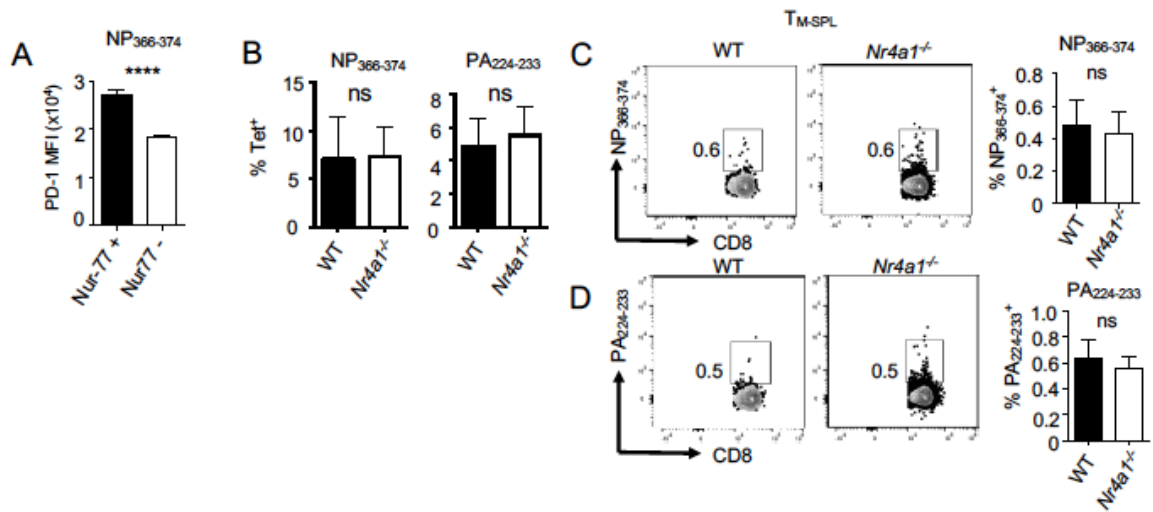

**Fig. S6 Nur77 (*Nr4a1*) is required for the induction and/or maintenance of exhausted-like T<sub>RM</sub> cells.** (A). Nur77-GFP mice were infected with PR8. PD-1 MFI of Nur77-GFP<sup>+</sup> and Nur77-GFP<sup>-</sup> NP<sub>366-374</sub> T<sub>RM</sub> cells at 40 d.p.i. (B-D). WT and *Nr4a1*<sup>-/-</sup> mixed bone marrow chimeric mice were constructed and infected with PR8. (B). Percentages of NP<sub>366-374</sub> or PA<sub>224-233</sub> tetramer<sup>+</sup> cells in the PBMCs at 12 d.p.i. (C). Representative plots (left) and quantification (right) of percentages of NP<sub>366-374</sub> spleen memory T cells at 40 d.p.i. (D). Representative plots (left) and quantification (right) of percentages of PA<sub>224-233</sub> spleen memory T cells. Representative of two experiments at 40 d.p.i. Data are mean ± SD, n.s., not significant. \*P < 0.05, \*\*P < 0.01, \*\*\*P < 0.001, unpaired two-tailed t test.



Fig. S7

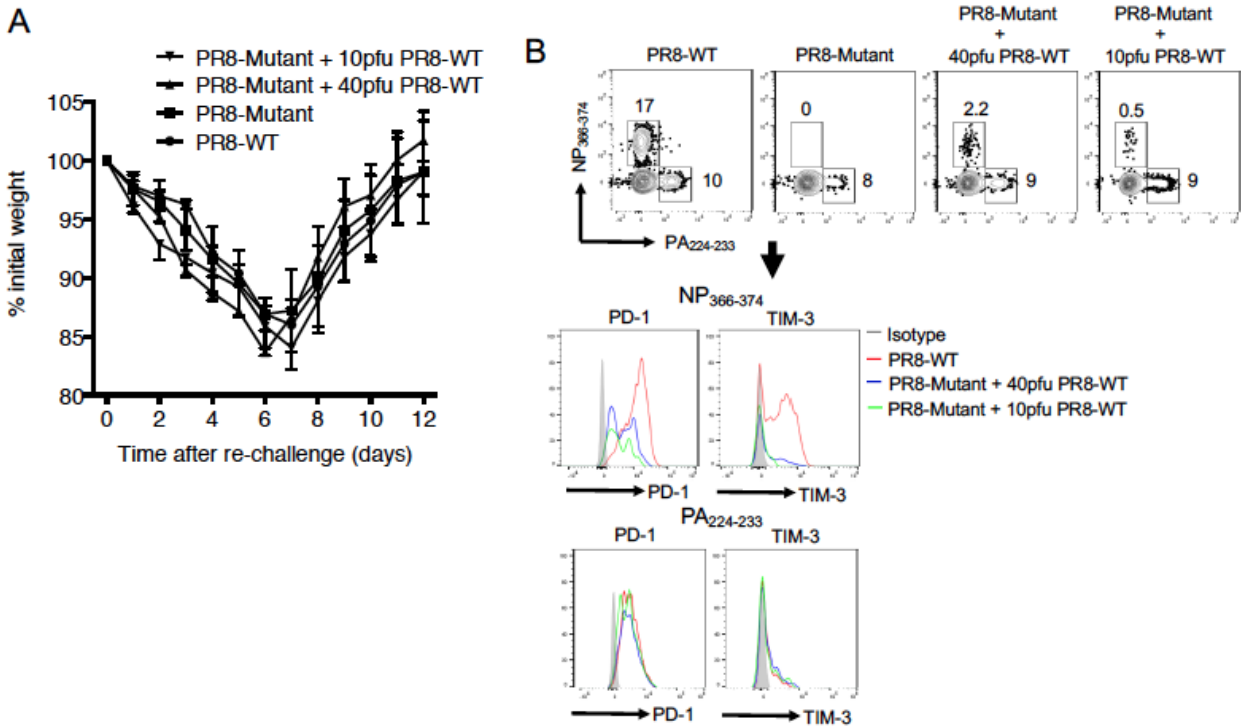

**Fig. S7 Limiting NP antigen dose decreases the "exhaustion" phenotype.** WT mice were infected with WT PR8 virus, PR8 NP mutant virus, PR8 NP mutant virus mixed with 10 pfu WT PR8 virus or PR8 NP mutant virus mixed with 40 pfu WT PR8 virus. (A) Host morbidity (% of initial weight) following infection. (B) PD-1 and TIM-3 expression on NP<sub>366-374</sub> or PA<sub>224-233</sub> T<sub>RM</sub> at 40 d.p.i.

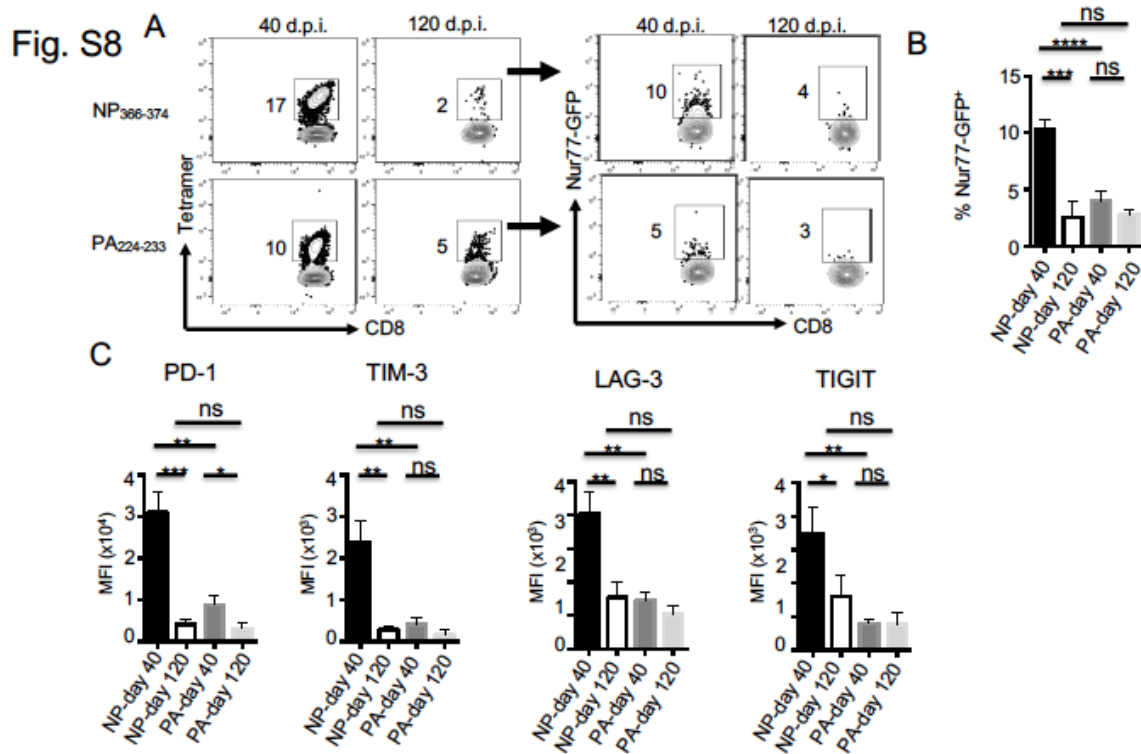

**Fig. S8 TCR signaling and inhibitory receptor expression on exhausted-like  $T_{RM}$  cells are lost 4 months after infection.**

(A-C). Nur77-GFP mice were infected with PR8 and  $T_{RM}$  cells were analyzed at 40 or 120 d.p.i. (A). Representative plots of Nur77-GFP expression in  $NP_{366-374}$   $T_{RM}$  cells at 40 or 120 d.p.i. (B). Quantification of percentages of Nur77-GFP<sup>+</sup> cells in  $NP_{366-374}$  or  $PA_{224-233}$   $T_{RM}$  cells at 40 or 120 d.p.i. (C). MFI of inhibitory receptors expression on  $NP_{366-374}$  or  $PA_{224-233}$   $T_{RM}$  cells at 40 or 120 d.p.i. Representative of three experiments. Data are mean  $\pm$  SD, n.s., not significant. \* $P < 0.05$ , \*\* $P < 0.01$ , \*\*\* $P < 0.001$ , unpaired two-tailed  $t$  test or One-way ANOVA with Tukey multiple comparison test.

Fig. S9

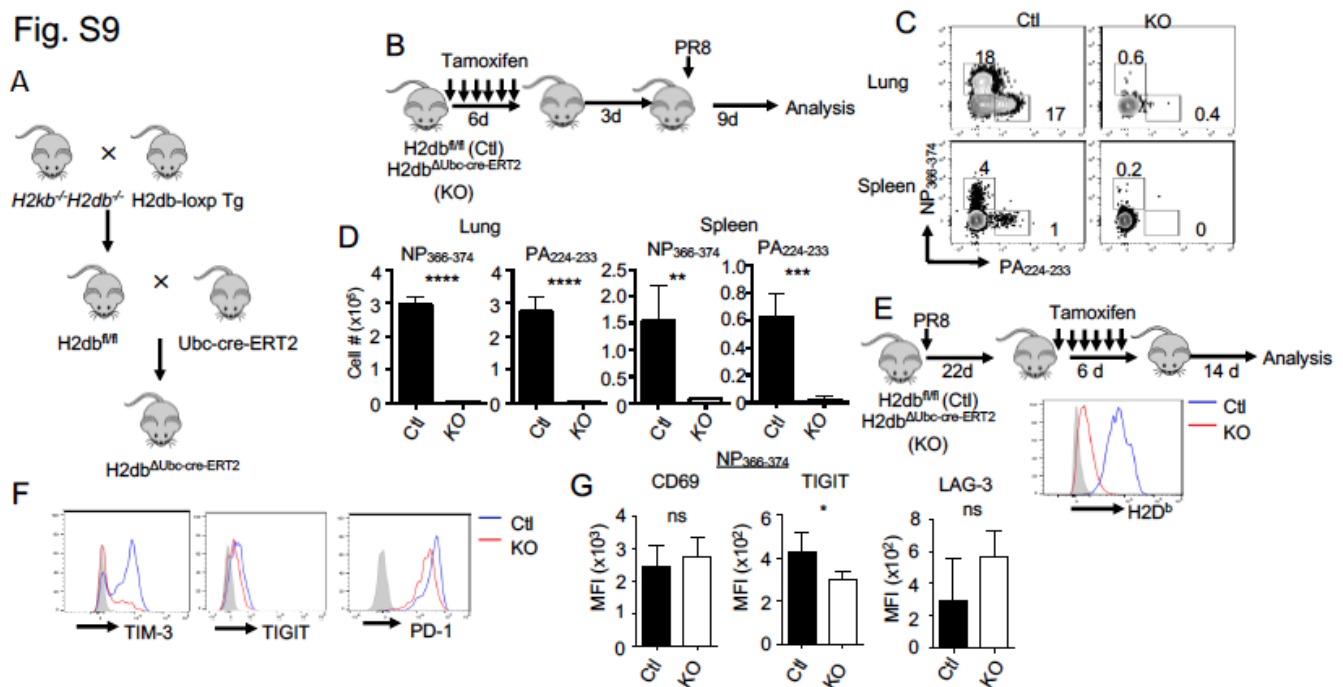

**Fig. S9 Persistent MHC-I engagement maintains exhausted-like T<sub>RM</sub> cell phenotypes and cells.** (A). Strategy of generation of  $H2db^{\Delta Ubc-cre-ERT2}$  (KO) mice.  $H2db-loxp$  transgenic mice were first bred to MHC-I KO ( $H2kb^{-/-}H2db^{-/-}$ ) mice to generate  $H2db^{fl/fl}$  mice. These animals were then crossed to  $Ubc-creERT2$  transgenic mice to generate  $Ubc-creERT2/H2db^{fl/fl}$  double transgenic mice in MHC-I-deficient background ( $H2db^{\Delta Ubc-cre-ERT2}$ ). (B-D). Control or  $H2db^{\Delta Ubc-cre-ERT2}$  (KO) mice were treated with tamoxifen and then infected with PR8. (B) Schematics of experimental design. (c). Representative plots of NP<sub>366-374</sub> or PA<sub>224-233</sub> specific T cells in lung or spleen CD8<sup>+</sup> T cells at 9 d.p.i. (D) Total cell numbers of NP<sub>366-374</sub> or PA<sub>224-233</sub> specific T cells in lung or spleen at 9 d.p.i. (E). Schematic of experimental design and representative histogram of H2D<sup>b</sup> expression in lung CD45<sup>+</sup> cells of control and KO mice 72 hours following last tamoxifen injection. (F). Representative histogram of PD-1, TIM-3 or TIGIT expression on NP<sub>366-374</sub> T<sub>RM</sub> cells at 42 d.p.i. (G). Quantification of MFI of CD69, TIGIT or LAG-3 expression on NP<sub>366-374</sub> T<sub>RM</sub> cells at 42 d.p.i. Data are mean ± SD, n.s., not significant. \*P < 0.05, \*\*P < 0.01, \*\*\*P < 0.001, unpaired two-tailed t test.

Fig. S10

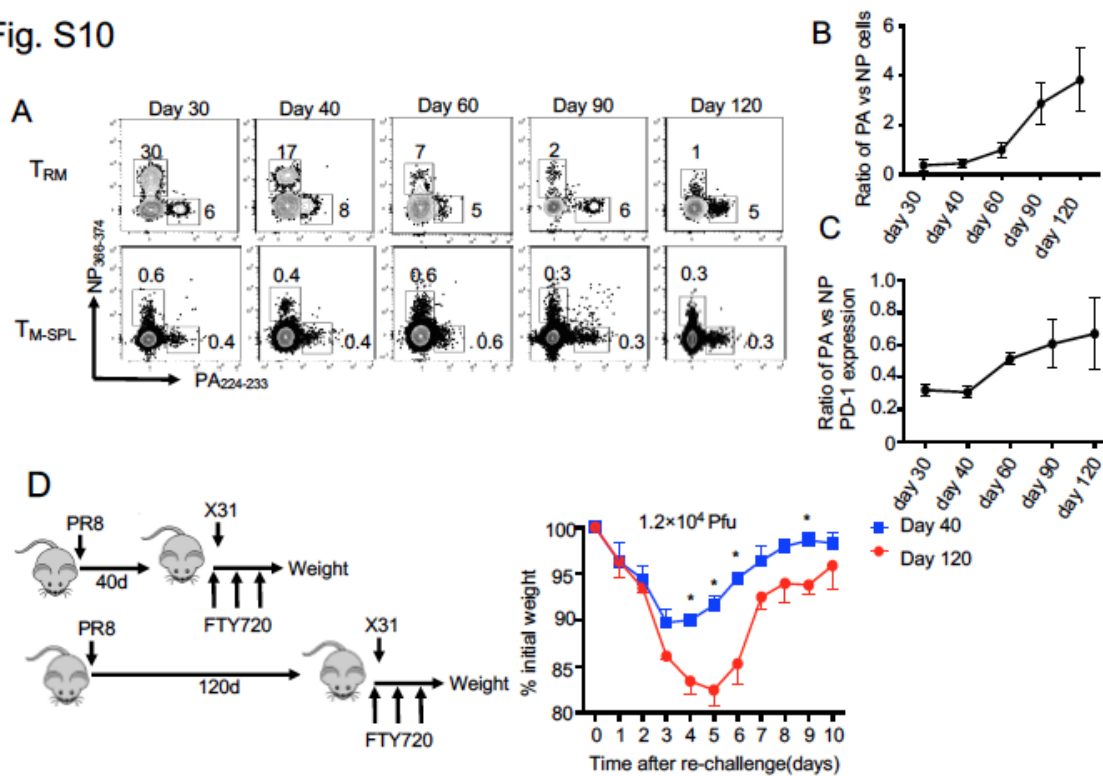

**Fig. S10 NP<sub>366-374</sub> T<sub>RM</sub> cells, PD-1 expression and heterologous protection are lost over time.** (A-C). WT mice were infected with PR8 and T<sub>RM</sub> cells were analyzed at indicated d.p.i. (A). Representative plots of percentage of NP<sub>366-374</sub> and PA<sub>224-233</sub> T<sub>RM</sub> cells or spleen memory T cells at indicated d.p.i. (B). Kinetics of ratio of % PA<sub>224-233</sub> to % NP<sub>366-374</sub> T<sub>RM</sub> at indicated d.p.i.. (C). Kinetics of ratio of PA<sub>224-233</sub> T<sub>RM</sub> PD-1 expression to NP<sub>366-374</sub> T<sub>RM</sub> PD-1 expression at indicated d.p.i. (D). WT mice were infected with PR8. Mice were re-challenged with X-31 ( $1.2 \times 10^4$  pfu/mouse) in the presence of FTY-720 at 40 and 120 d.p.i. Mouse weight loss (% initial weight) was determined daily following re-challenge. Representative of two experiments. Data are mean  $\pm$  SD, \*P < 0.05, \*\*P < 0.01, \*\*\*P < 0.001, unpaired two-tailed t test.

Fig. S11

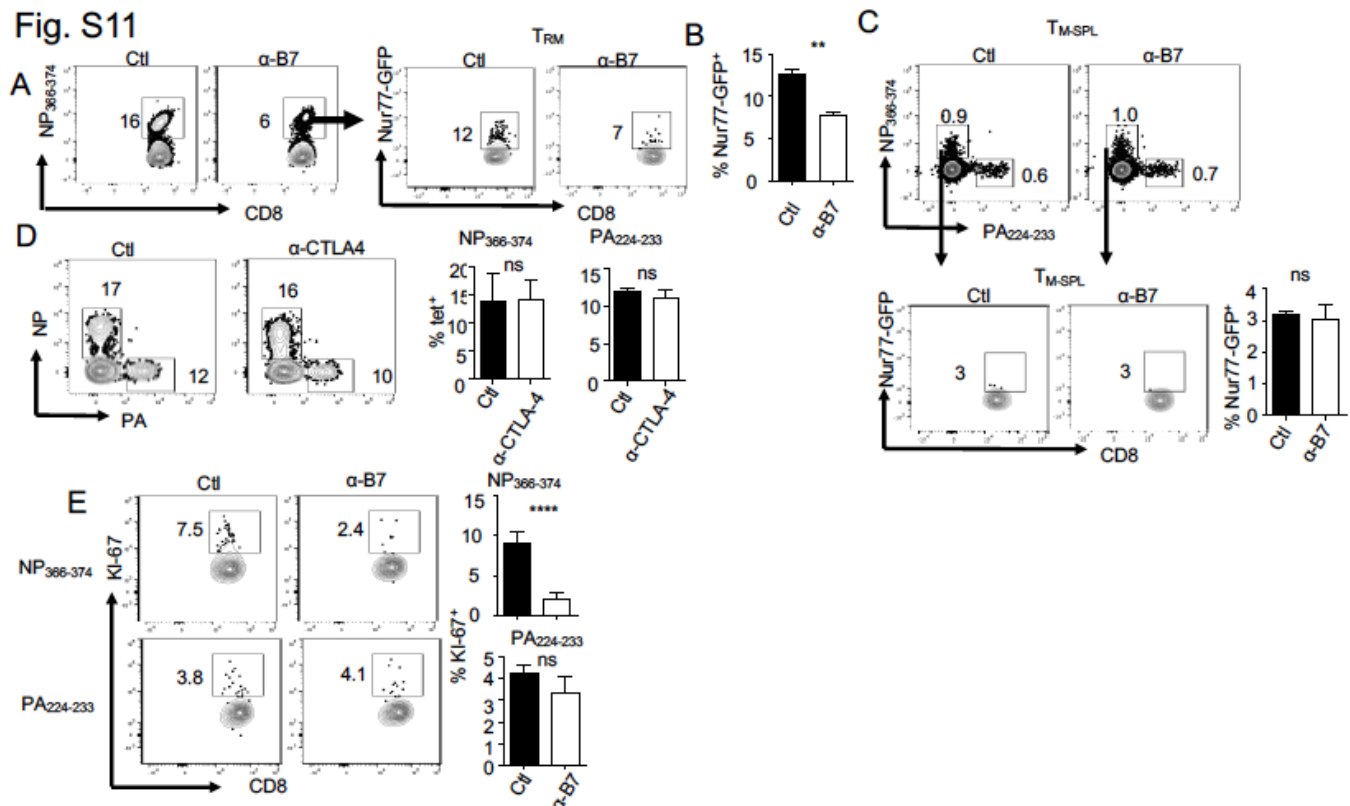

**Fig. S11 Continuous CD28 signaling is required for the maintenance of NP<sub>366-374</sub> T<sub>RM</sub> cells.** (A-C). Nur77-GFP mice were infected with PR8 and treated with control Ab or  $\alpha$ -B7 starting at day 21 p.i. T<sub>RM</sub> cells were analyzed at 42 d.p.i. Representative plots (A) and percentages (B) of Nur77-GFP<sup>+</sup> cells in NP<sub>366-374</sub> T<sub>RM</sub> cells. (C). Representative plots (left) and percentages (right) of Nur77-GFP<sup>+</sup> cells in NP<sub>366-374</sub> spleen memory T cells. (D). WT mice were infected with PR8 and treated with control Ab or  $\alpha$ -CTLA-4 starting at day 21 p.i.. Representative plots (left) and % (right) of NP<sub>366-374</sub> or PA<sub>224-233</sub> T<sub>RM</sub> cells at 42 d.p.i. (E) WT mice were infected with PR8 and treated with control Ab or  $\alpha$ -B7 starting at day 21 p.i. Representative plots (left) and % of KI-67<sup>+</sup> (right) cells in NP<sub>366-374</sub> or PA<sub>224-233</sub> T<sub>RM</sub> cells. Representative of two to three experiments except (A). Data are mean  $\pm$  SD, n.s., not significant. \*P < 0.05, \*\*P < 0.01, \*\*\*P < 0.001, unpaired two-tailed t test.

Fig. S12

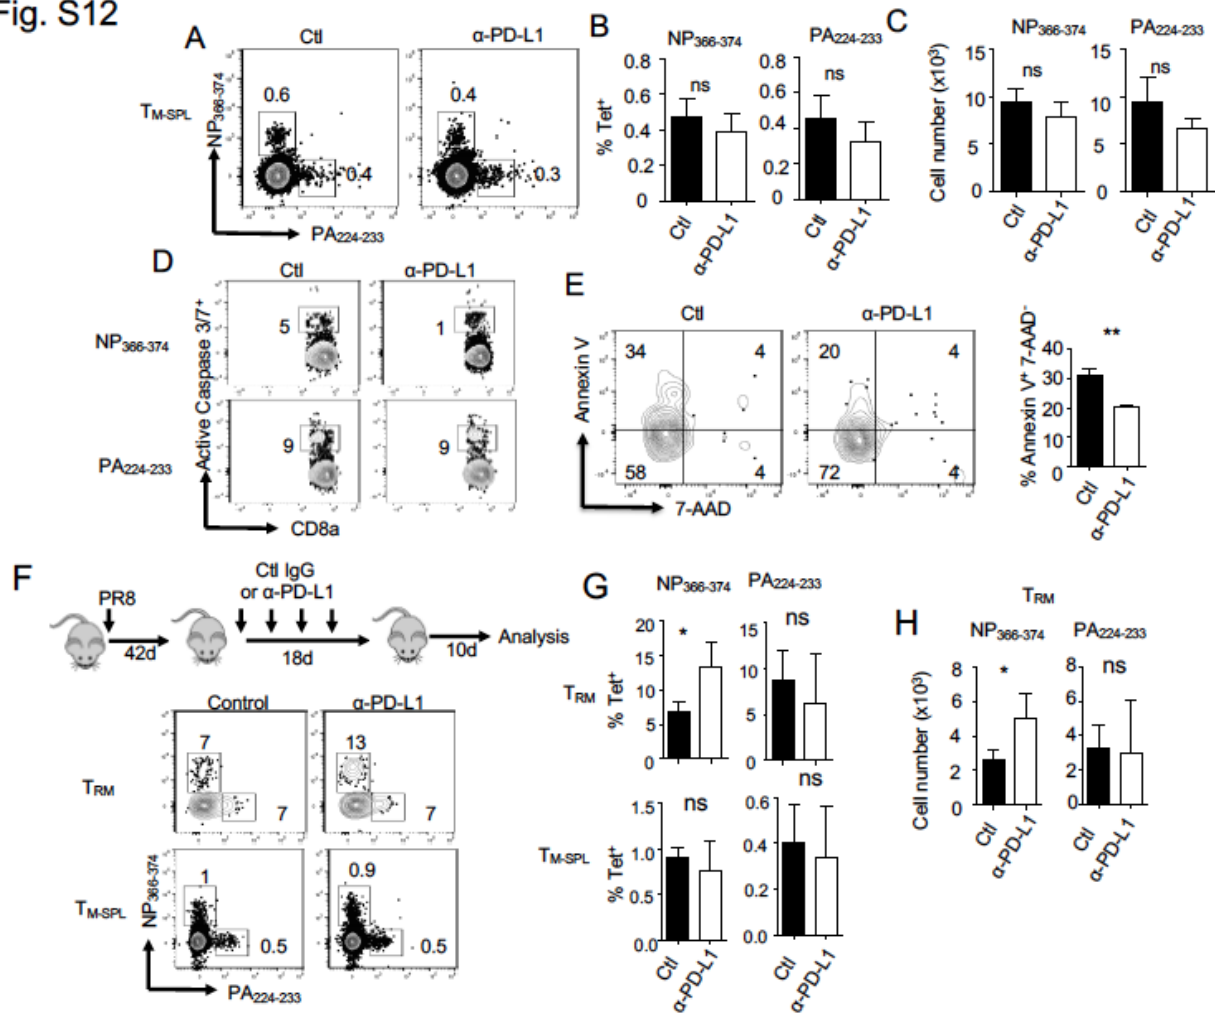

**Fig. S12 PD-L1 blockade promotes exhausted-like T<sub>RM</sub> cell survival and CD103 expression.** (A-E). WT mice were infected with PR8 and treated with control Ab or α-PD-L1 starting at day 21 p.i. T<sub>RM</sub> cells were analyzed at 40 d.p.i. (A). Representative plots of % NP<sub>366-374</sub> or PA<sub>224-233</sub> in total CD8 T cells in the spleen. (B). Quantification of % NP<sub>366-374</sub> or PA<sub>224-233</sub> in splenic CD8 T cells. (C). Quantification of cell numbers of NP<sub>366-374</sub> or PA<sub>224-233</sub> spleen memory T cells. (D). Representative plots of active Caspase 3/7<sup>+</sup> cells in NP<sub>366-374</sub> or PA<sub>224-233</sub> T<sub>RM</sub> with or without late PD-L1 blockade. (E). Representative plots of Annexin V/7-AAD expression (left) and quantification (right) of Annexin V<sup>+</sup> cells in NP<sub>366-374</sub> T<sub>RM</sub> with or without late PD-L1 blockade. (F-H). WT mice were infected with PR8. Mice were treated with control or α-PD-L1 starting at 42 d.p.i. till 60 d.p.i. as indicated (F). (F). Representative plots of NP<sub>366-374</sub> or PA<sub>224-233</sub> T<sub>RM</sub> frequencies in resident CD8<sup>+</sup> T cells at 70 d.p.i. (G). % of NP<sub>366-374</sub> or PA<sub>224-233</sub> T<sub>RM</sub> or T<sub>M-SPL</sub> in lung or splenic CD8 T cells at 70 d.p.i. (H). Numbers of NP<sub>366-374</sub> or PA<sub>224-233</sub> T<sub>RM</sub> at 70 d.p.i. Representative of three to four experiments except (F-H). Data are mean ± SD, n.s., not significant. \*P < 0.05, \*\*P < 0.01, \*\*\*P < 0.001, unpaired two-tailed t test.

Fig. S13

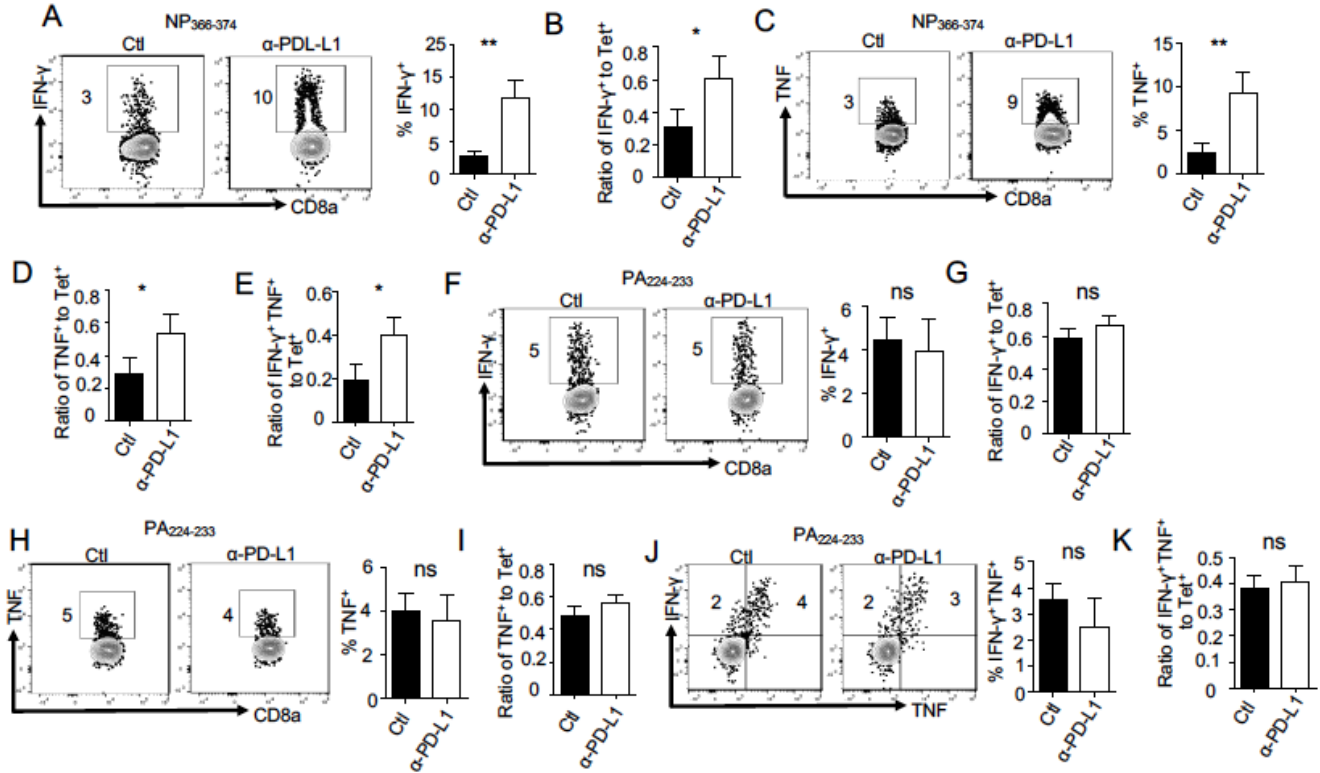

**Fig. S13 PD-L1 blockade promotes cytokine production of exhausted-like T<sub>RM</sub> cells to antigenic re-stimulation. (A-K).** WT mice were infected with PR8 and treatment with control Ab or α-PD-L1 starting at day 21 p.i. Mice were sacrificed and lung cells were re-stimulated with NP<sub>366-374</sub> or PA<sub>224-233</sub> peptide *ex vivo* at 40 d.p.i. IFN-γ and TNF production by CD8 T cells following peptide re-stimulation were determined by ICS. (A). Representative plots (left) and quantification (right) of % IFN-γ<sup>+</sup> in resident-CD8 T cells following NP peptide stimulation. (B). Ratio of % IFN-γ<sup>+</sup> resident CD8 T cells cells following NP peptide stimulation to % NP<sub>366-374</sub> tetramer<sup>+</sup> in resident-CD8 T cells. (C). Representative plots (left) and quantification (right) of % TNF<sup>+</sup> in resident-CD8 T cells following NP peptide stimulation. (D). Ratio of % TNF<sup>+</sup> cells following NP peptide stimulation to % NP<sub>366-374</sub> tetramer<sup>+</sup> in resident-CD8 T cells. (E). Ratio of % IFN-γ<sup>+</sup> TNF<sup>+</sup> cells following NP peptide stimulation to % NP<sub>366-374</sub> tetramer<sup>+</sup> in resident-CD8 T cells. (F). Representative plots (left) and quantification (right) of % IFN-γ<sup>+</sup> in resident-CD8 T cells following PA peptide stimulation. (G). Ratio of % IFN-γ<sup>+</sup> cells following PA peptide stimulation to % PA<sub>224-233</sub> tetramer<sup>+</sup> in resident-CD8 T cells. (H). Representative plots (left) and quantification (right) of % TNF<sup>+</sup> in resident-CD8 T cells following PA peptide stimulation. (I). Ratio of % TNF<sup>+</sup> cells following PA peptide stimulation to % PA<sub>224-233</sub> tet<sup>+</sup> in resident CD8 T cells. (J). Representative plots (left) and quantification (right) of IFN-γ<sup>+</sup> TNF<sup>+</sup> cells in resident-CD8 T cells following PA peptide stimulation. (K). Ratio of % IFN-γ<sup>+</sup> TNF<sup>+</sup> cells following PA peptide stimulation to % PA<sub>224-233</sub> tetramer<sup>+</sup> in resident CD8 T cells. Representative of three experiments. Data are mean ± SD, n.s., not significant. \*P < 0.05, \*\*P < 0.01, \*\*\*P < 0.001, unpaired two-tailed t test.

Fig. S14

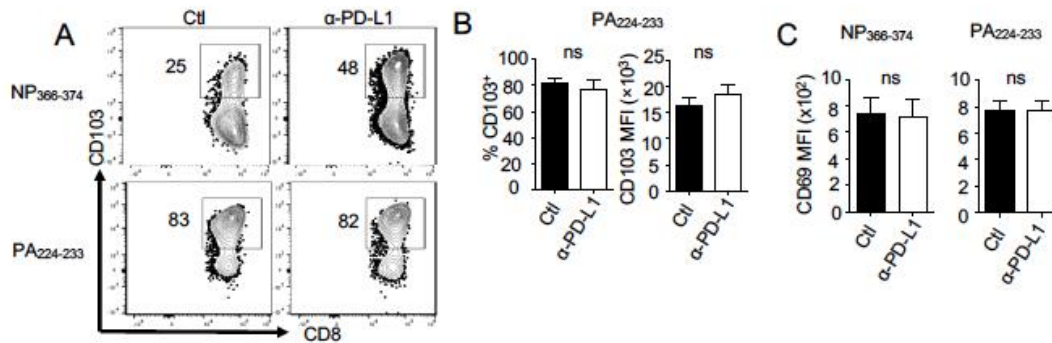

**Fig. S14 PD-L1 blockade promotes CD103 expression.** (A-C). WT mice were infected with PR8 and treated with control Ab or  $\alpha$ -PD-L1 starting at day 21p.i. T<sub>RM</sub> cells were analyzed at 40 d.p.i. (A). Representative plots of CD103 expression on NP<sub>366-374</sub> and PA<sub>224-233</sub> T<sub>RM</sub> with or without late PD-L1 blockade. (B). Quantification of % CD103<sup>+</sup> cells (left) and CD103 MFI on (right) PA<sub>224-233</sub> T<sub>RM</sub> with or without late PD-L1 blockade. (C). CD69 MFI on NP<sub>366-374</sub> or PA<sub>224-233</sub> T<sub>RM</sub> with or without late PD-L1 blockade. Representative of three or five experiments. Data are mean  $\pm$  SD, n.s, not significant. \*P < 0.05, \*\*P < 0.01, \*\*\*P < 0.001, unpaired two-tailed t test.



Fig. S15

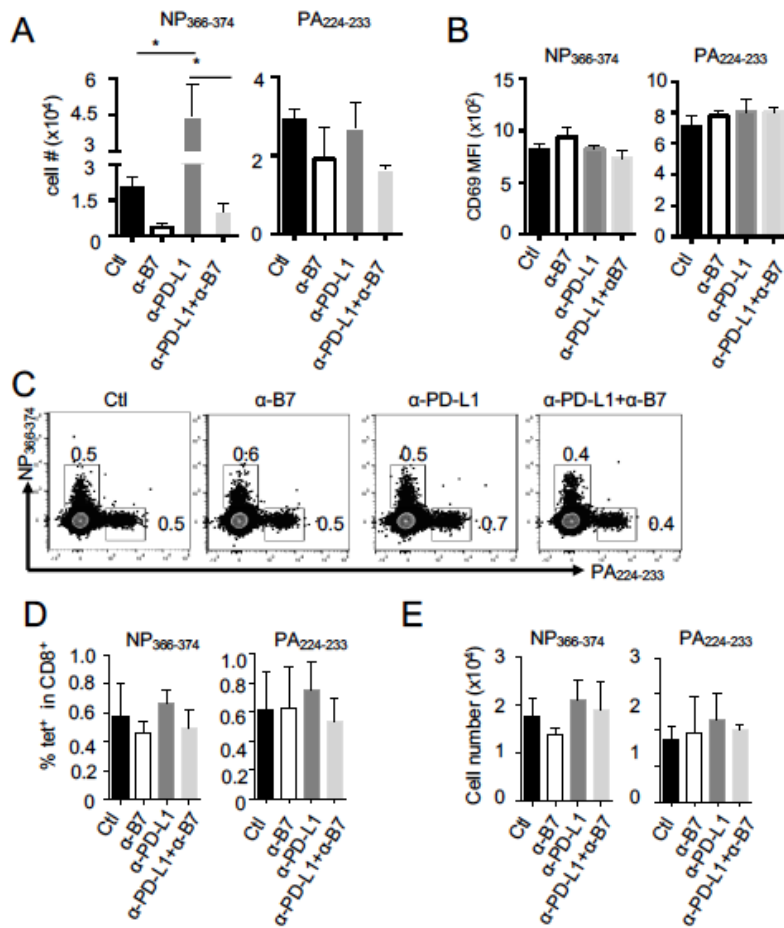

**Fig. S15 B7 signaling is required for the effects of PD-L1 blockade.** (A-E). WT mice were infected with PR8 and treated with control Ab,  $\alpha$ -B7,  $\alpha$ -PD-L1 or  $\alpha$ -PD-L1 plus  $\alpha$ -B7 starting at day 21p.i. T<sub>RM</sub> cells were analyzed at 40 d.p.i. (A). Quantification of NP<sub>366-374</sub> or PA<sub>224-233</sub> T<sub>RM</sub> cell numbers. (B). CD69 MFI of NP<sub>366-374</sub> or PA<sub>224-233</sub> T<sub>RM</sub> cells. (C). Representative plots of % NP<sub>366-374</sub> or PA<sub>224-233</sub> cells in spleen CD8 T cells. (D). Quantification of % NP<sub>366-374</sub> or PA<sub>224-233</sub> cells in spleen CD8 T cells. (E). Quantification of NP<sub>366-374</sub> or PA<sub>224-233</sub> spleen memory T cell numbers. Representative of two experiments. Data are mean  $\pm$  SD, \*P < 0.05, \*\*P < 0.01, \*\*\*P < 0.001, One-way ANOVA with Tukey multiple comparison test.

Fig. S16

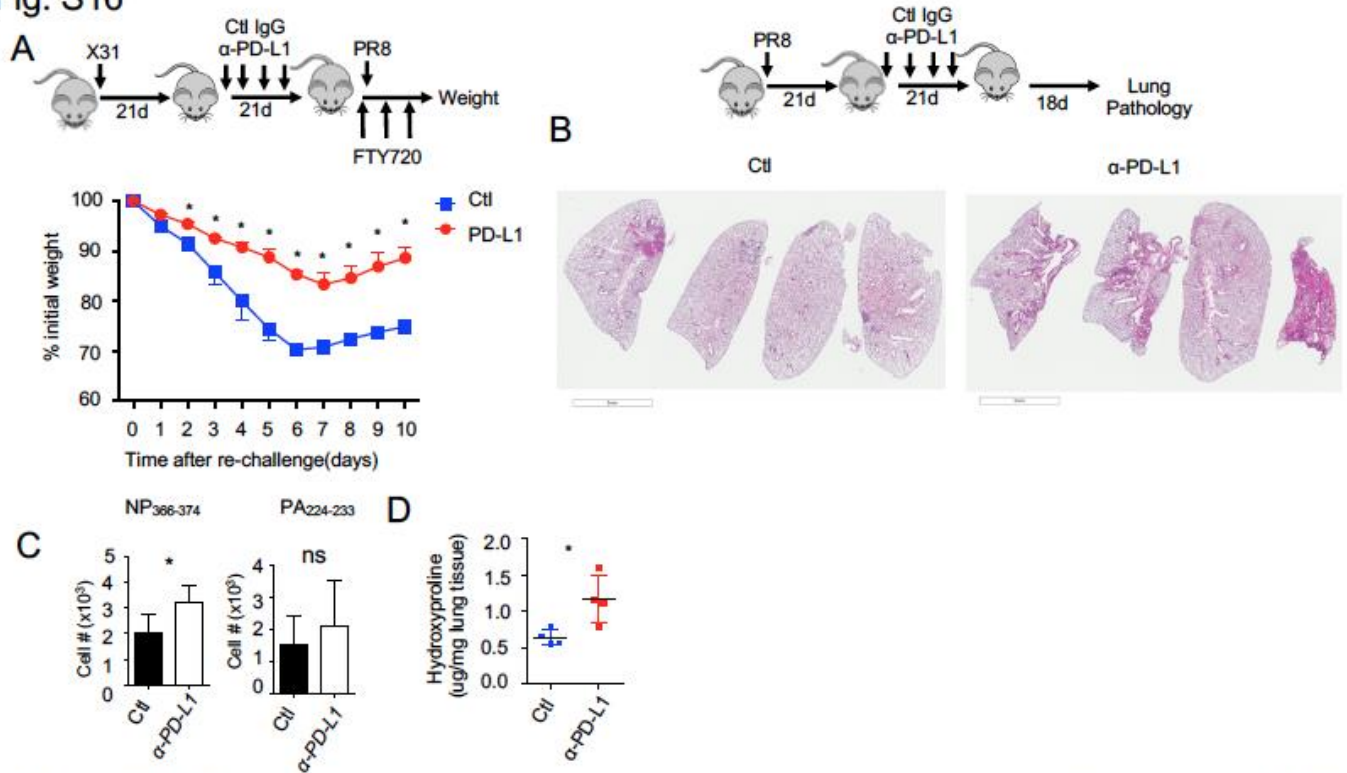

**Fig. S16 PD-L1 blockade promotes heterologous immunity and causes tissue pathology.** (A). WT mice were infected with X31. Control Ab or  $\alpha$ -PD-L1 was administered starting at 21 d.p.i. as indicated. Mice were re-challenged with PR8 in the presence of FTY-720 at 42 d.p.i. % of original weight was determined daily following re-challenge. (B). WT mice were infected with PR8 with or without PD-L1 blockade. Lung pathology was determined by H&E staining at 60 d.p.i. Low-magnitude picture of whole sections of lung left lobes from 4 individual mice are shown. Low-magnitude picture of whole sections of lung left lobes from 3-4 individual mice are shown. (C-D) WT mice were infected with PR8. Control Ab or  $\alpha$ -PD-L1 was administered starting at 21 d.p.i. till 42 d.p.i. Mice were sacrificed at 90 d.p.i. (C). NP<sub>366-374</sub> or PA<sub>224-233</sub> T<sub>RM</sub> numbers in the lung. (D). Lung collagen content was determined through hydroxyproline assay.

Fig. S17

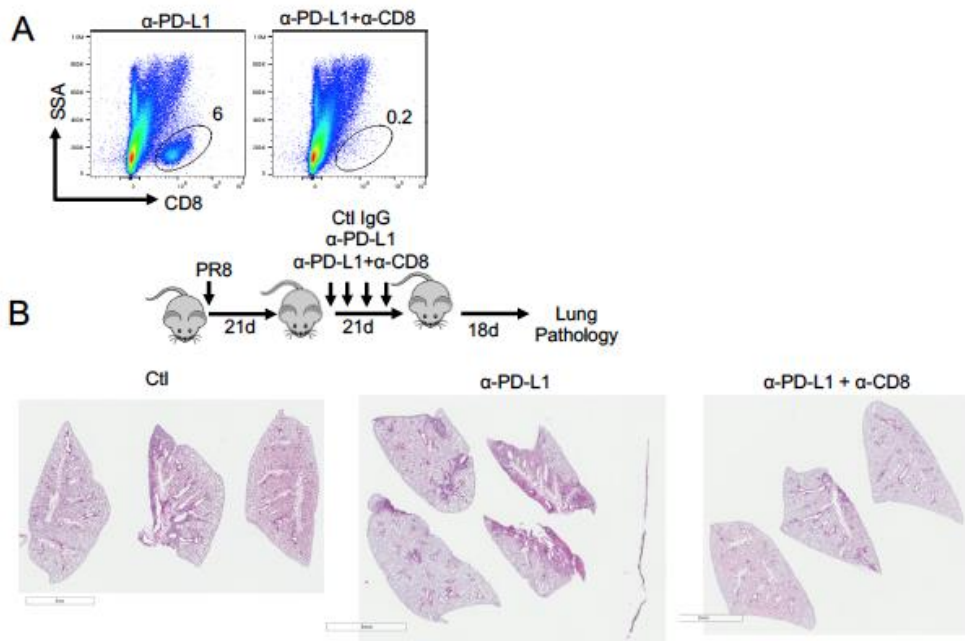

**Fig. S17 CD8 T cells are responsible for the development of tissue pathology following  $\alpha$ -PD-L1 blockade.** WT mice were infected with PR8 and received control, PD-L1 or PD-L1 plus CD8 Abs. (A). Representative plots of lung CD8 T cells following  $\alpha$ -PD-L1 or  $\alpha$ -PD-L1 plus  $\alpha$ -CD8 treatment at 60 d.p.i. (B). Lung pathology was determined by H&E staining at 60 d.p.i. Low-magnitude picture of whole sections of lung left lobes from 3-4 individual mice are shown.

Fig. S18

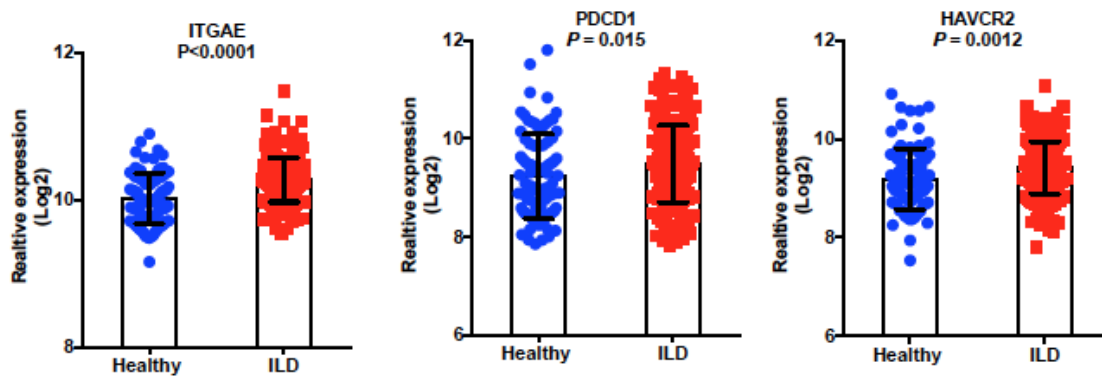

**Fig. S18 ILD lungs exhibit elevated PD-1, CD103 and TIM-3 expression.** ITGAE (CD103), PDCD1 (PD-1) and HAVCR2 (TIM-3) gene expression in publically-available microarray dataset (GSE47460) of lung biopsy samples from lungs of healthy or ILD patients. Unpaired two-tailed t test
